# Supplementary material for: Further improvement of battery performance via charge transfer enhanced by solution-based antimony doping into tin dioxide nanofibers
Source: Royal Society of Chemistry journal article supplement (doi:10.1039/c4ta00384e), 2014-01-01
Supplement: c4ta00384e1.pdf [file c4ta00384e1.pdf]

## Supporting information

### **Further improvement of battery performance via charge transfer enhanced by solution-based antimony doping into tin dioxide nanofibers**

**Yong Seok Kim<sup>a</sup>, Won Bae Kim<sup>b</sup> and Yong Lak Joo<sup>\*a</sup>**

<sup>a</sup> *School of Chemical and Biomolecular Engineering, Cornell University, Ithaca, 14853, USA. E-mail: ylj2@cornell.edu*

<sup>b</sup> *School of Materials Science and Engineering, Gwangju Institute of Science and Technology (GIST), Gwangju, 500-712, Republic of Korea.*

Table R1. Summarized atomic percentages of oxygen, tin and antimony for undoped and doped nanofibers.

| <b>Element</b>                           | <b>Undoping<br/>/ at.%</b> | <b>Nominal 5 at.%<br/>doping<br/>/ at.%</b> | <b>Nominal 10<br/>at.% doping<br/>/ at.%</b> | <b>Nominal 15<br/>at.% doping<br/>/ at.%</b> |
|------------------------------------------|----------------------------|---------------------------------------------|----------------------------------------------|----------------------------------------------|
| <b>Oxygen</b>                            | 81.20                      | 78.70                                       | 78.05                                        | 76.71                                        |
| <b>Tin</b>                               | 18.80                      | 19.87                                       | 19.98                                        | 20.18                                        |
| <b>Antimony<br/>(doping at.% to tin)</b> | –                          | 1.43<br><b>(6.7 at.%)</b>                   | 1.97<br><b>(8.9 at.%)</b>                    | 3.11<br><b>(13.3 at.%)</b>                   |

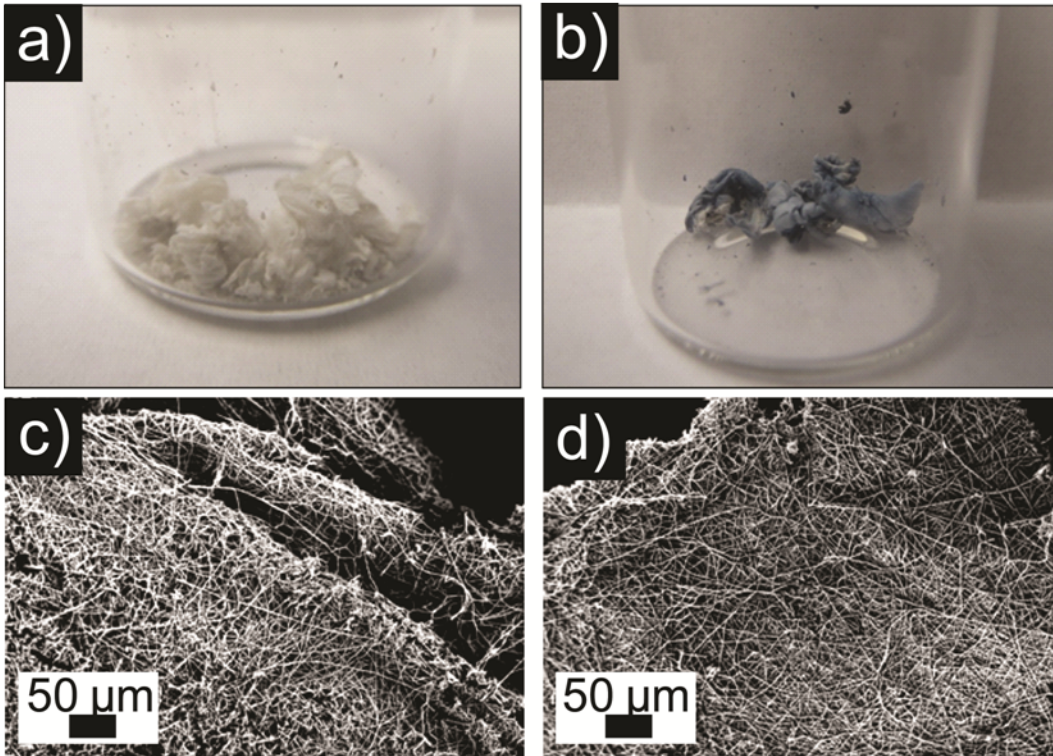

**Figure S1.** The photographs of (a) pure SnO<sub>2</sub> nanofibers and (b) Sb-doped SnO<sub>2</sub> nanofibers; the SEM images of (c) pure SnO<sub>2</sub> nanofibers and d) Sb-doped SnO<sub>2</sub> nanofibers.

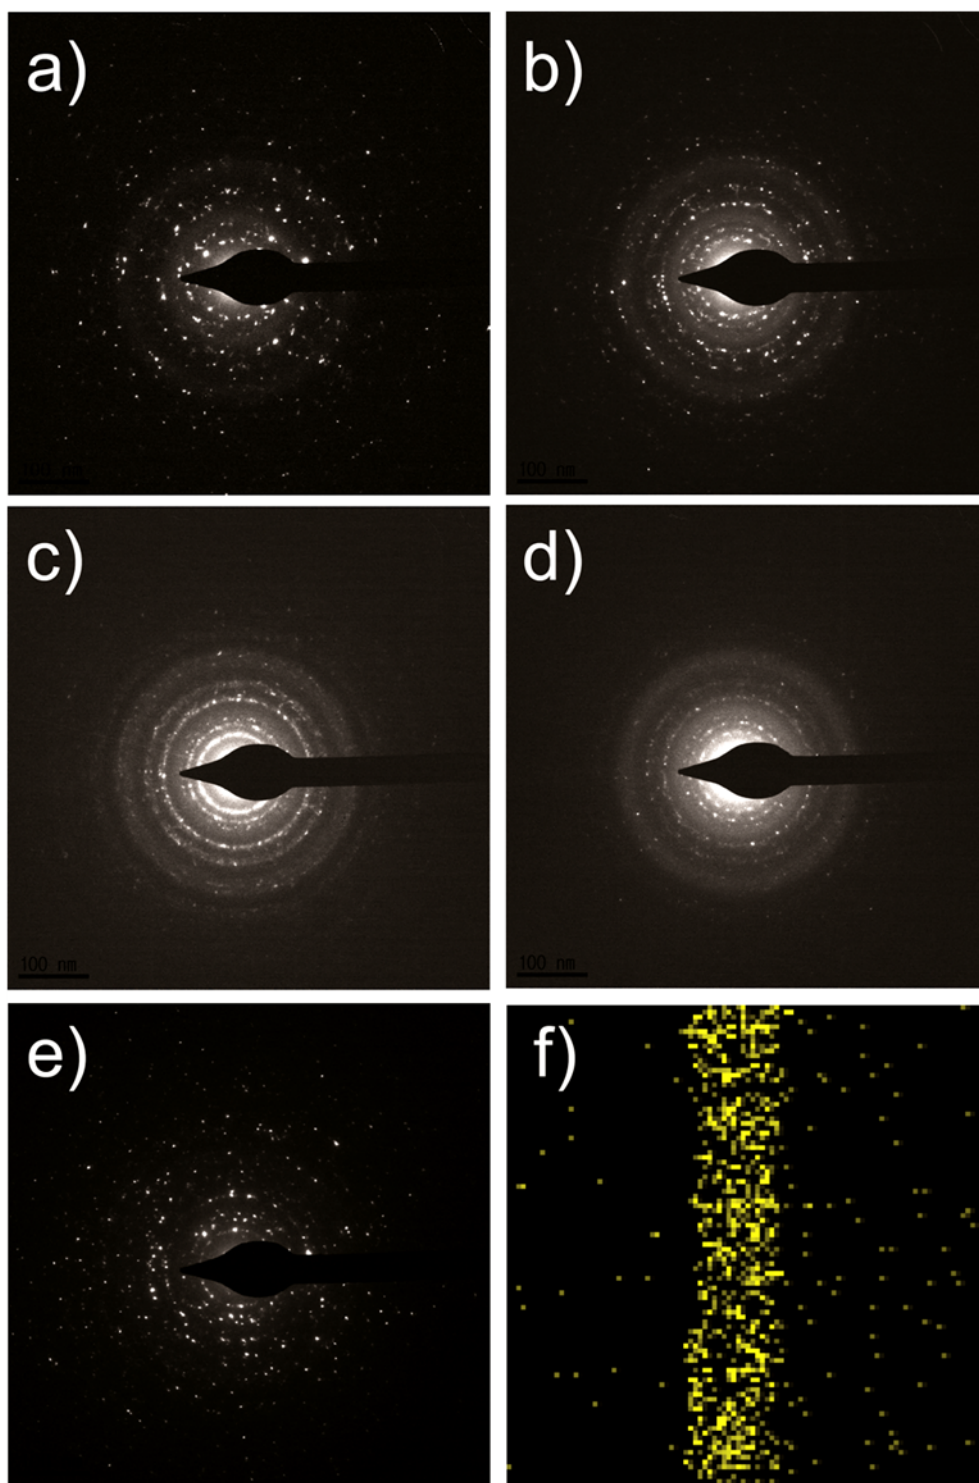

**Figure S2.** The selected area electron patterns of (a) pure SnO<sub>2</sub> nanofibers and Sb-doped SnO<sub>2</sub> nanofibers with variable doping ratios of (b) 5 mol%, (c) 10 mol%, (d) 15 mol% and (e) 20 mol% ; Antimony element mapping image of Sb-doped (10 mol%) SnO<sub>2</sub> nanofibers by energy dispersive X-ray spectroscopy of TEM.

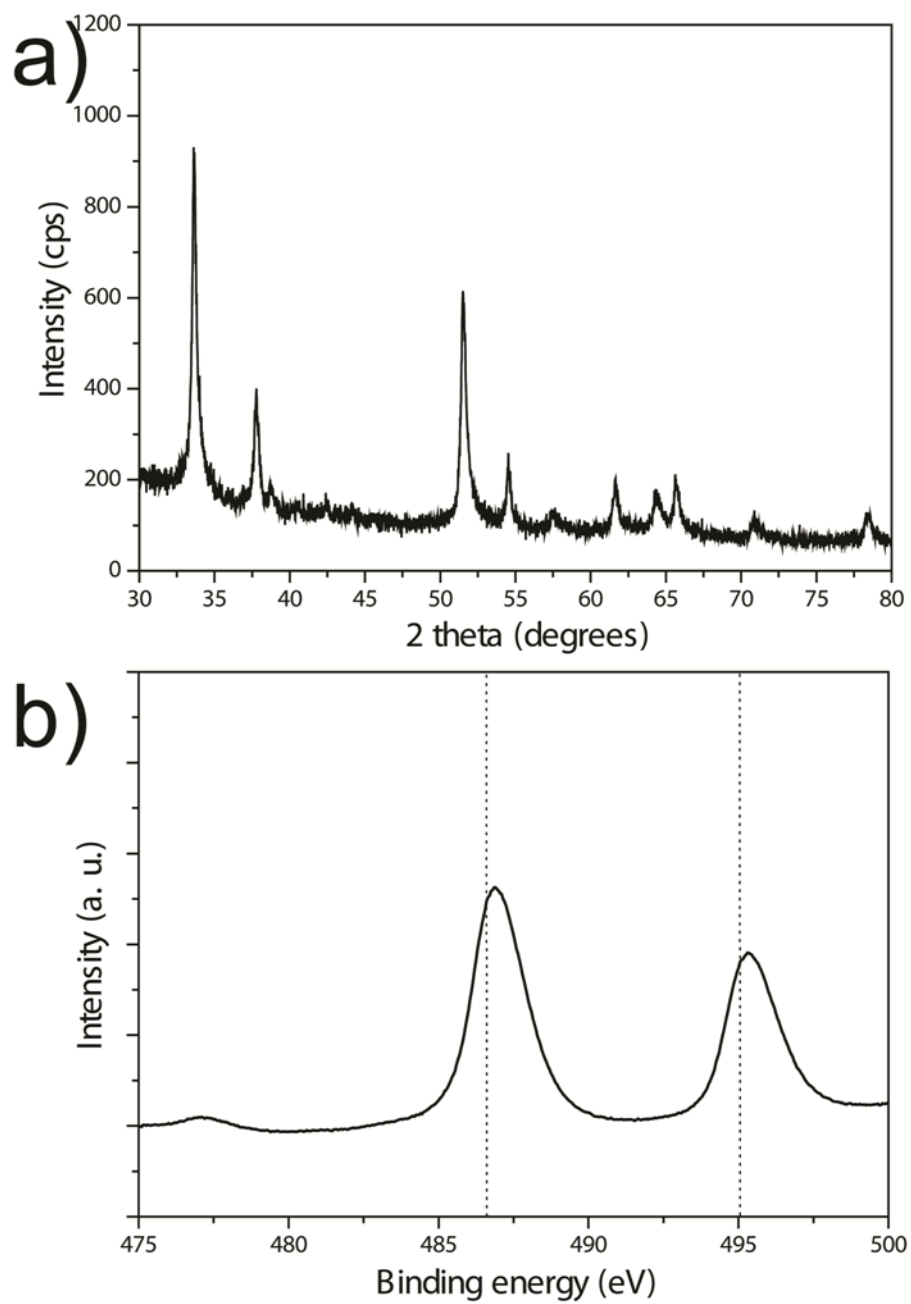

**Figure S3.** (a) x-ray diffraction and (b) x-ray photoelectron spectrum of Sn3d for Sb-doped (20 mol%) SnO<sub>2</sub> nanofibers.

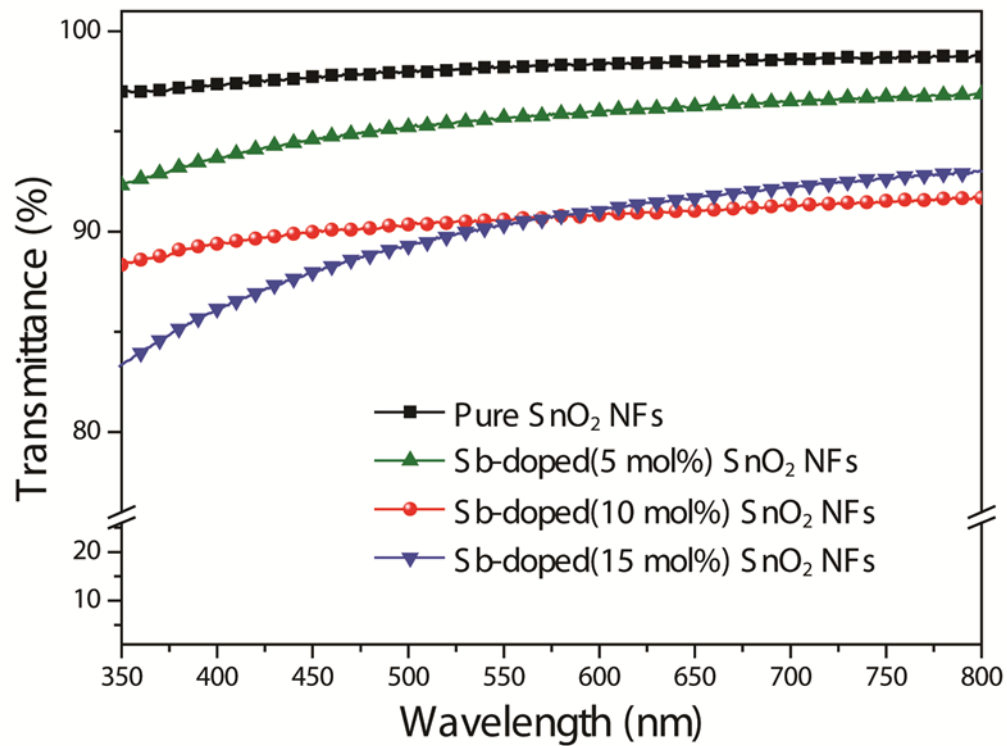

**Figure S4.** Transmittance spectra of pure SnO<sub>2</sub> nanofibers and Sb-doped SnO<sub>2</sub> nanofibers with variable doping ratios from 5 mol% to 15 mol%.

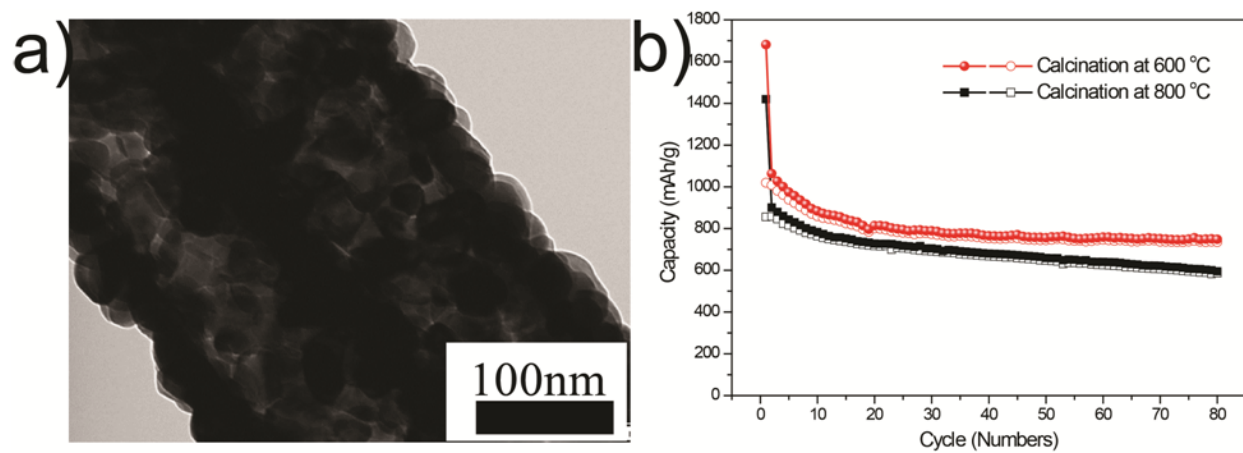

**Figure S5.** a) TEM image of Sb-doped SnO<sub>2</sub> nanofiber calcined at 800 °C and b) cycle life of Sb-doped SnO<sub>2</sub> nanofibers calcined at 800 °C and 600 °C.
